# Supplementary material for: Trends in hospital admissions for childhood fractures in England
Source: BMJ Paediatr Open. 2021 Nov 9;5(1):e001187. doi: 10.1136/bmjpo-2021-001187 (PMC8587381; doi:10.1136/bmjpo-2021-001187)
Supplement: Supplementary data [file bmjpo-2021-001187supp001.xlsx]

## Sheet: Sheet1
List of included codes
code	Name	Mapped to body area
S12.0	Fracture of first cervical vertebra	C-spine
S12.1	Fracture of second cervical vertebra	C-spine
S12.2	Fracture of other specified cervical vertebra	C-spine
S12.8	Fracture of other parts of neck	C-spine
S12.9	Fracture of neck, part unspecified	C-spine
S62.0	Fracture of navicular [scaphoid] bone of hand	carpus
S62.1	Fracture of other carpal bone(s)	carpus
P13.4	Fracture of clavicle due to birth injury	clavicle
S42.0	Fracture of clavicle	clavicle
S72.3	Fracture of shaft of femur	femur
S72.4	Fracture of lower end of femur	femur
S72.8	Fractures of other parts of femur	femur
S72.9	Fracture of femur, part unspecified	femur
S92.9	Fracture of foot, unspecified	foot
S52.0	Fracture of upper end of ulna	Forearm
S52.1	Fracture of upper end of radius	Forearm
S52.2	Fracture of shaft of ulna	Forearm
S52.3	Fracture of shaft of radius	Forearm
S52.4	Fracture of shafts of both ulna and radius	Forearm
S52.5	Fracture of lower end of radius	Forearm
S52.6	Fracture of lower end of both ulna and radius	Forearm
S52.8	Fracture of other parts of forearm	Forearm
S52.9	Fracture of forearm, part unspecified	Forearm
S62.5	Fracture of thumb	hand
S62.6	Fracture of other finger	hand
S62.8	Fracture of other and unspecified parts of wrist and hand	hand
S92.0	Fracture of calcaneus	hindfoot
S92.1	Fracture of talus	hindfoot
S72.0	Fracture of neck of femur	hip
S72.1	Pertrochanteric fracture	hip
S72.2	Subtrochanteric fracture	hip
S42.2	Fracture of upper end of humerus	humerus
S42.3	Fracture of shaft of humerus	humerus
S42.4	Fracture of lower end of humerus	humerus
S32.0	Fracture of lumbar vertebra	L-spine
S82.1	Fracture of upper end of tibia	lower leg
S82.2	Fracture of shaft of tibia	lower leg
S82.3	Fracture of lower end of tibia	lower leg
S82.4	Fracture of fibula alone	lower leg
S82.5	Fracture of medial malleolus	lower leg
S82.6	Fracture of lateral malleolus	lower leg
S82.8	Fractures of other parts of lower leg	lower leg
S82.9	Fracture of lower leg, part unspecified	lower leg
S62.2	Fracture of first metacarpal bone	metacarpal
S62.3	Fracture of other metacarpal bone	metacarpal
S82.0	Fracture of patella	patella
S32.1	Fracture of sacrum	pelvis
S32.2	Fracture of coccyx	pelvis
S32.3	Fracture of ilium	pelvis
S32.4	Fracture of acetabulum	pelvis
S32.5	Fracture of pubis	pelvis
S32.8	Fracture of other and unspecified parts of lumbar spine and pelvis	pelvis
S42.1	Fracture of scapula	scapula
P13.0	Fracture of skull due to birth injury	skull
S02.0	Fracture of vault of skull	skull
S02.1	Fracture of base of skull	skull
S02.3	Fracture of orbital floor	skull
S02.4	Fracture of malar and maxillary bones	skull
S02.6	Fracture of mandible	skull
S02.8	Fractures of other skull and facial bones	skull
S02.9	Fracture of skull and facial bones, part unspecified	skull
T08.X	Fracture of spine, level unspecified	spine
S22.0	Fracture of thoracic vertebra	t0spine
S92.2	Fracture of other tarsal bone(s)	tarsal bones
S92.3	Fracture of metatarsal bone	tarsal bones
S22.2	Fracture of sternum	thorax
S22.3	Fracture of rib	thorax
S22.8	Fracture of other parts of bony thorax	thorax
S22.9	Fracture of bony thorax, part unspecified	thorax
S92.4	Fracture of great toe	toe
S92.5	Fracture of other toe	toe
